# Supplementary material for: SyntaLinker: automatic fragment linking with deep conditional transformer neural networks
Source: PubMed Central journal article supplement — Chem Sci. 2020 Jul 22;11(31):8312–22. doi: 10.1039/d0sc03126g (PMC8163338; doi:10.1039/d0sc03126g), 2020-07-22
Supplement: SC-011-D0SC03126G-s003.pdf [file SC-011-D0SC03126G-s003.pdf]

## Supporting Information

### SyntaLinker: Automatic Fragment Linking with Deep Conditional Transformer Neural Networks

Yuyao Yang,<sup>‡ab</sup> Shuangjia Zheng,<sup>‡a</sup> Shimin Su,<sup>ab</sup> Chao Zhao<sup>a</sup>, Jun Xu,<sup>\*a</sup> and Hongming  
Chen<sup>\*b</sup>

E-mail: chen\_hongming@grmh-gdl.cn; junxu@biochemomes.com

<sup>a</sup> *Research Center for Drug Discovery, School of Pharmaceutical Sciences, Sun Yat-Sen University, 132 East Circle at University City, Guangzhou 510006, China.*

<sup>b</sup> *Center of Chemistry and Chemical Biology, Guangzhou Regenerative Medicine and Health Guangdong Laboratory, Guangzhou 510530, China.*

<sup>‡</sup> *Authors contributed equally.*

**Table S1** The range of some key hyperparameters in SyntaLinker and the chosen ones for the best model are in bold

| Hyperparameters        | Search range and best value       |
|------------------------|-----------------------------------|
| Batch size             | 256, 502, 1024, 2048, <b>4096</b> |
| Hidden states          | 128, <b>256</b> , 512             |
| Attention heads        | 2, 4, 6, <b>8</b> , 10            |
| Optimizer              | SGD, <b>Adam</b> , Adagrad        |
| Starting learning rate | 0.001 ~ 2 ( <b>1</b> )            |
| Drop out               | 0 ~ 1 ( <b>0.1</b> )              |
| Decay factor           | 0 ~ 1 ( <b>0.5</b> )              |

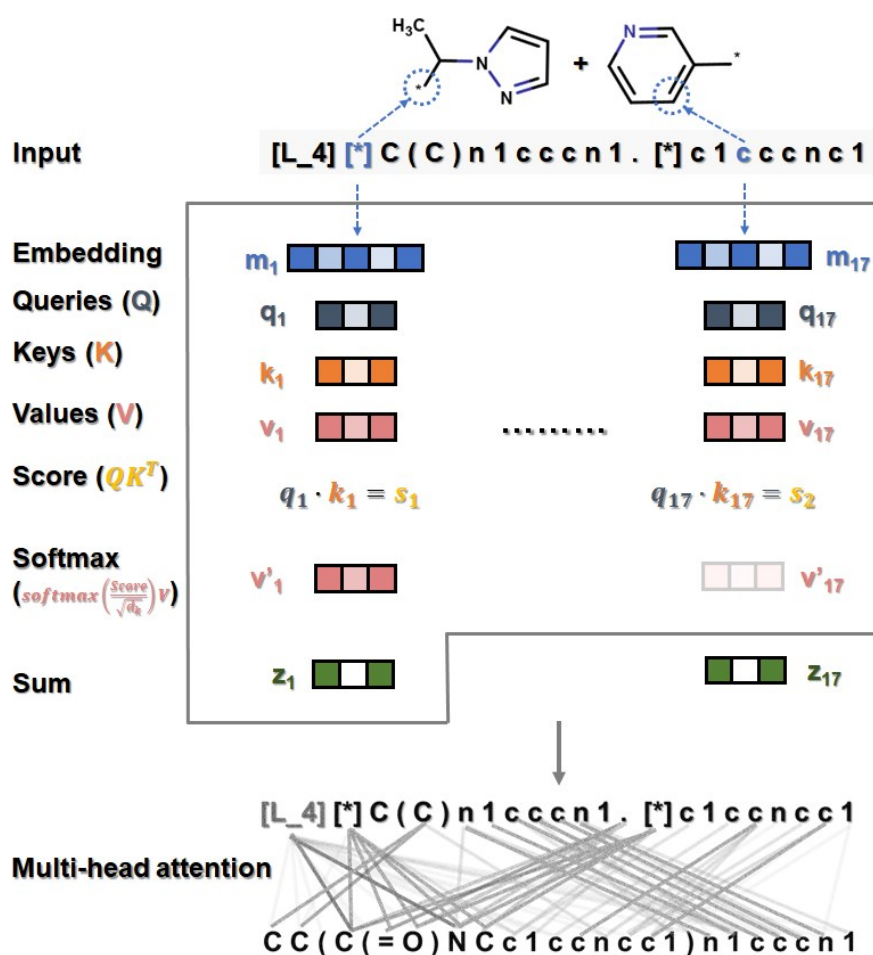

**Fig. S1** The graphical illustration of attention mechanism in SyntaLinker. The lines in the Multi-head attention map refers to some important attention weight between the output tokens and input tokens.
