# Supplementary figures and images for: SyntaLinker: automatic fragment linking with deep conditional transformer neural networks
Source: Royal Society of Chemistry journal article supplement (doi:10.1039/d0sc03126g), 2020-01-01

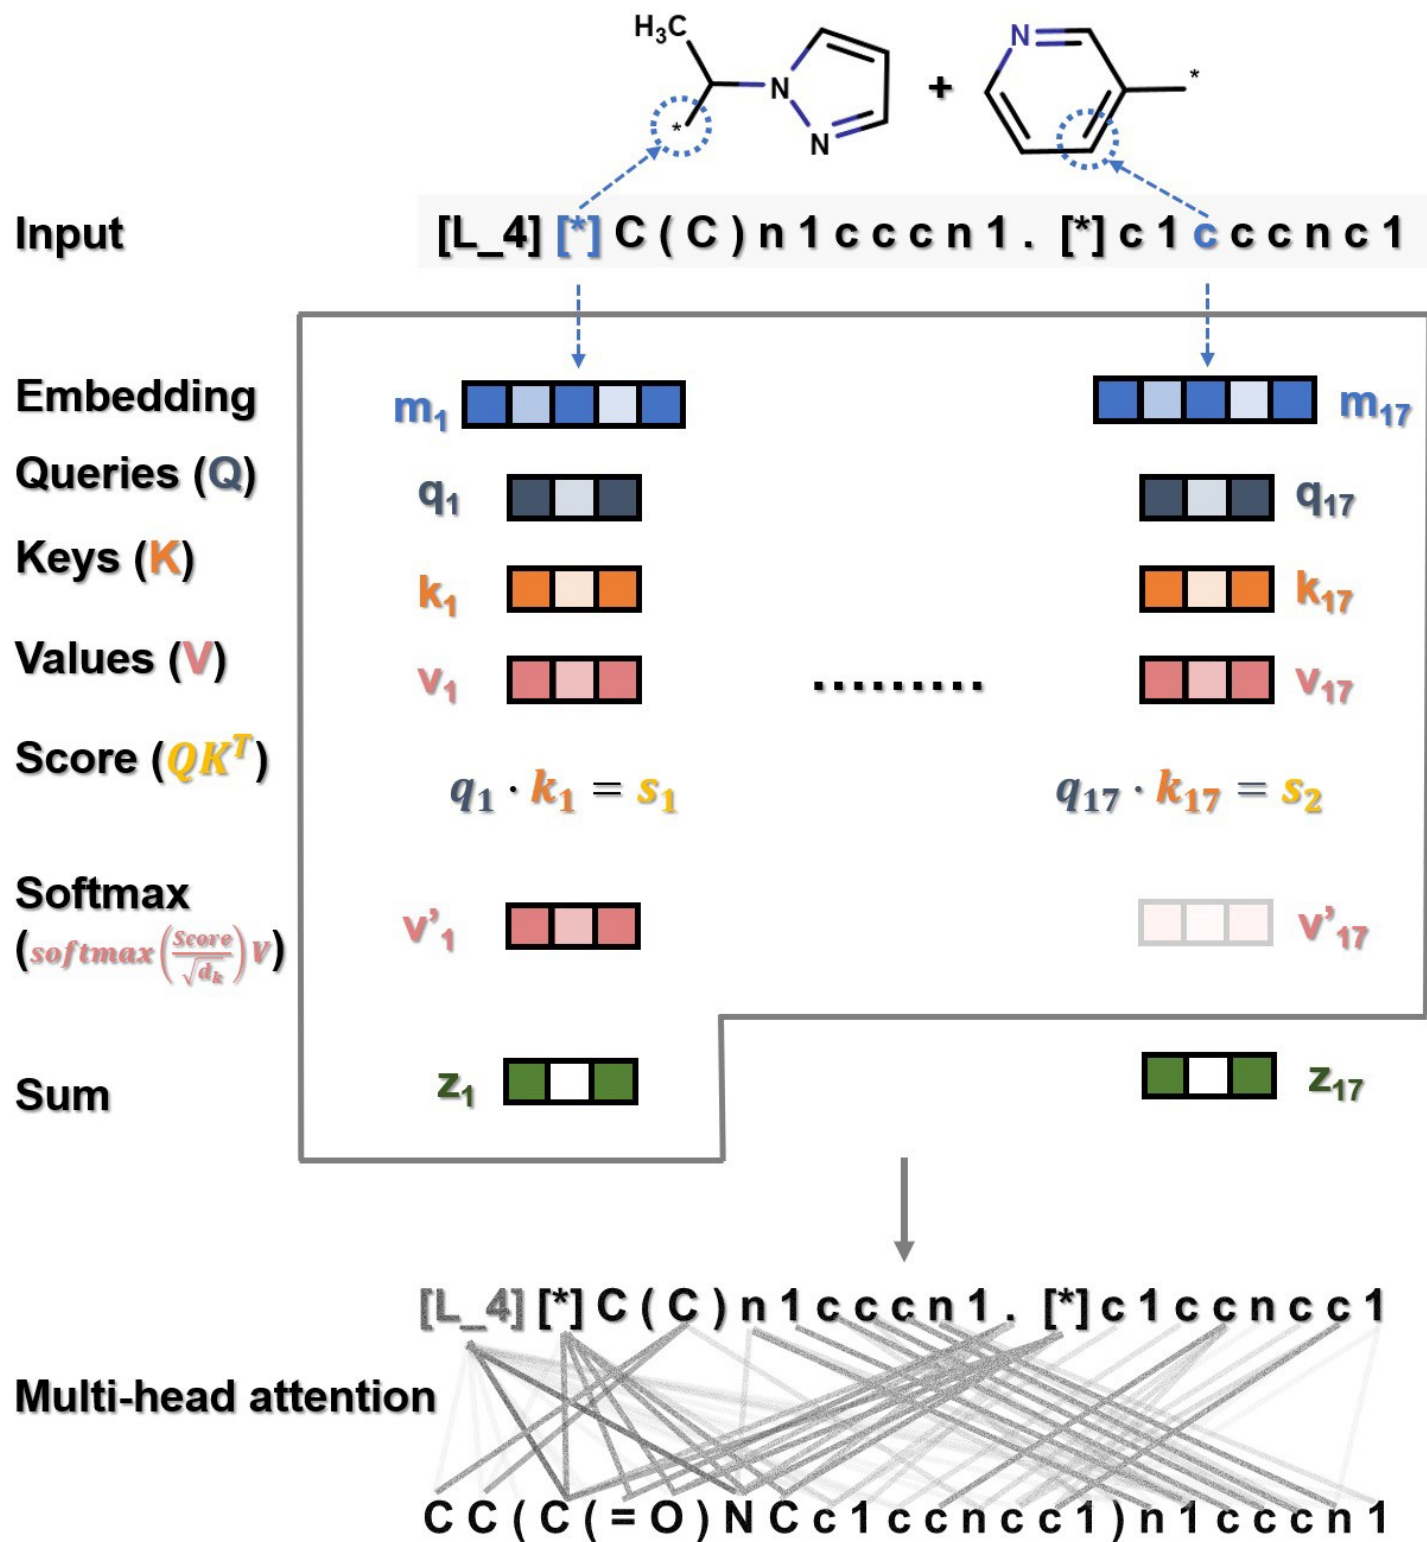

Supplement: d0sc03126g2.pdf [file d0sc03126g2.pdf]
